# Supplementary material for: Evaluation of grade and invasiveness of bladder urothelial carcinoma using infrared imaging and machine learning
Source: Royal Society of Chemistry journal article supplement (doi:10.1039/d2an01583h), 2022-12-16
Supplement: d2an01583h1.pdf [file d2an01583h1.pdf]

## Electronic Supplementary Information

### **Fourier transform infrared spectroscopy imaging as a screening tool to predict the grade and invasiveness of urothelial carcinoma of the bladder**

Monika Kujdowicz <sup>1,2</sup>, David Perez-Guaita<sup>3\*</sup>, Piotr Chlosta<sup>4</sup>, Krzysztof Okon <sup>1</sup> and Kamilla Malek <sup>2\*</sup>

<sup>1</sup> Department of Pathomorphology, Faculty of Medicine, Jagiellonian University Medical College, Krakow, Grzegorzeczka 16, 31-531, Poland

<sup>2</sup> Faculty of Chemistry, Jagiellonian University, Krakow, Gronostajowa 2, 30-387, Poland

<sup>3</sup> Department of Analytical Chemistry, University of Valencia, 50 Dr. Moliner Street, Research Building, 46100 Burjassot, Valencia, Spain

<sup>4</sup> Department of Urology, Medical Faculty, Jagiellonian University Medical College, Krakow, Jakubowskiego 2, 30-688, Poland

**Table S1.** Positions of FTIR bands with their assignment to vibrational modes and biomolecules.<sup>10,15,21,37</sup>

| <b>Band [cm<sup>-1</sup>]</b> | <b>Assignment</b>                                                                                               |
|-------------------------------|-----------------------------------------------------------------------------------------------------------------|
| <b>967</b>                    | DNA; $\nu(\text{CNC})$                                                                                          |
| <b>995</b>                    | RNA, glycogen; carbohydrate rings stretch and deformation                                                       |
| <b>1026</b>                   | Glycogen; $\delta(\text{COH})$                                                                                  |
| <b>1052</b>                   | Sugar moieties in DNA, polysaccharides, glycoproteins, collagen; $\nu(\text{C-O})$                              |
| <b>1081</b>                   | Collagen, nucleic acids, phosphate-containing molecules, glycogen; $\nu_s(\text{PO}_2^-)$ , $\nu(\text{CC})$    |
| <b>1119-1111</b>              | Polysaccharides, RNA, lactate; $\nu(\text{C-O})$ , $\nu(\text{CC-OC})$                                          |
| <b>1154</b>                   | Glycogen, $\nu_{\text{as}}(\text{CO-O-C})$                                                                      |
| <b>1200</b>                   | Collagen, $\nu(\text{COH, COC})$                                                                                |
| <b>1233</b>                   | Nucleic acids and other phosphate-containing molecules, $\nu_{\text{as}}(\text{PO}_2^-)$ ; collagens, amide III |
| <b>1280</b>                   | Collagens, amide III,                                                                                           |
| <b>1335</b>                   | Collagens amide III:                                                                                            |
| <b>1370-1393</b>              | free fatty acids and amino acids; $\nu_s(\text{COO}^-)$                                                         |
| <b>1450</b>                   | Proteins, lipids, carbohydrates; $\delta(\text{CH}_2, \text{CH}_3)$                                             |
| <b>1516</b>                   | Tyrosine residue, elastin; $\nu(\text{CC})_{\text{ring}}$                                                       |
| <b>1544</b>                   | Proteins; amide II; $\delta(\text{NH}) + \nu(\text{C-N})$                                                       |
| <b>1573</b>                   | Lipids, proteins, nucleic acids; $\nu(\text{C=N, C=C})$                                                         |
| <b>1591</b>                   | free amino acids; $\nu_{\text{as}}(\text{COO}^-)$                                                               |
| <b>1637</b>                   | Proteins ( $\beta$ -sheets); amide I; collagen and elastin: $\nu(\text{C=O}) + \delta(\text{N-H})$              |
| <b>1652</b>                   | Proteins ( $\alpha$ -helix); amide I; $\nu(\text{C=O}) + \delta(\text{N-H})$                                    |
| <b>1673</b>                   | Amide I; $\nu(\text{C=O}) + \delta(\text{N-H})$                                                                 |
| <b>1687</b>                   | Proteins ( $\beta$ -turns); amide I, DNA; $\nu(\text{C=O}) + \delta(\text{N-H})$ , $\nu(\text{C=C, C=O})$       |
| <b>1743</b>                   | Triglycerides, phospholipids; $\nu(\text{C=O})$ ester group                                                     |

$\nu$  – stretching mode,  $\nu_{\text{as}}$  – antisymmetric,  $\nu_s$  – symmetric;  $\delta$  – in-plane deformation.

**Table S2.** The position of regression vectors for the constructed models for BC classification (in  $\text{cm}^{-1}$ ). Bold numbers indicate the specific IR features of the epithelium and subepithelium.

| N (ve-) vs<br>BC (ve+) |             | Tni (ve-) vs<br>Tinv (ve+) |             | HG (ve-) vs<br>LG (ve+) BC |      | N (ve-) vs<br>BC (ve+) |             | Tni (ve-) vs<br>Tinv (ve+) |             |
|------------------------|-------------|----------------------------|-------------|----------------------------|------|------------------------|-------------|----------------------------|-------------|
| Epithelium             |             |                            |             |                            |      | Subepithelium          |             |                            |             |
| ve-                    | ve+         | ve-                        | ve+         | ve-                        | ve+  | ve-                    | ve+         | ve-                        | ve+         |
| 1697                   | 1683        | <b>1590</b>                | <b>1660</b> | 1660                       | 1682 | 1697                   | 1683        | <b>1682</b>                | <b>1652</b> |
| 1670                   | <b>1608</b> | <b>1552</b>                | <b>1565</b> | 1633                       | 1609 | 1672                   | <b>1657</b> | <b>1640</b>                | <b>1623</b> |
| 1586                   | <b>1547</b> | <b>1524</b>                | 1477        | 1576                       | 1547 | 1585                   | <b>1635</b> | <b>1544</b>                | 1562        |
| 1397                   | <b>1485</b> | 1460                       | <b>1431</b> | 1487                       | 1457 | <b>1547</b>            | <b>1558</b> | 1464                       | 1447        |
| 1310                   | <b>1447</b> | <b>1337</b>                | <b>1165</b> | 1435                       | 1215 | 1398                   | 1414        | <b>1364</b>                | <b>1397</b> |
| <b>1140</b>            | 1413        | <b>1226</b>                | <b>1158</b> | 1164                       | 1043 | 1311                   | <b>1247</b> | <b>1214</b>                | <b>1136</b> |
| 1043                   | <b>1060</b> | <b>1188</b>                | <b>1108</b> | 980                        | 992  | 1049                   | 996         | <b>1082</b>                | <b>1068</b> |
|                        | 996         | <b>1043</b>                |             |                            |      | <b>1010</b>            |             | <b>1023</b>                | <b>980</b>  |

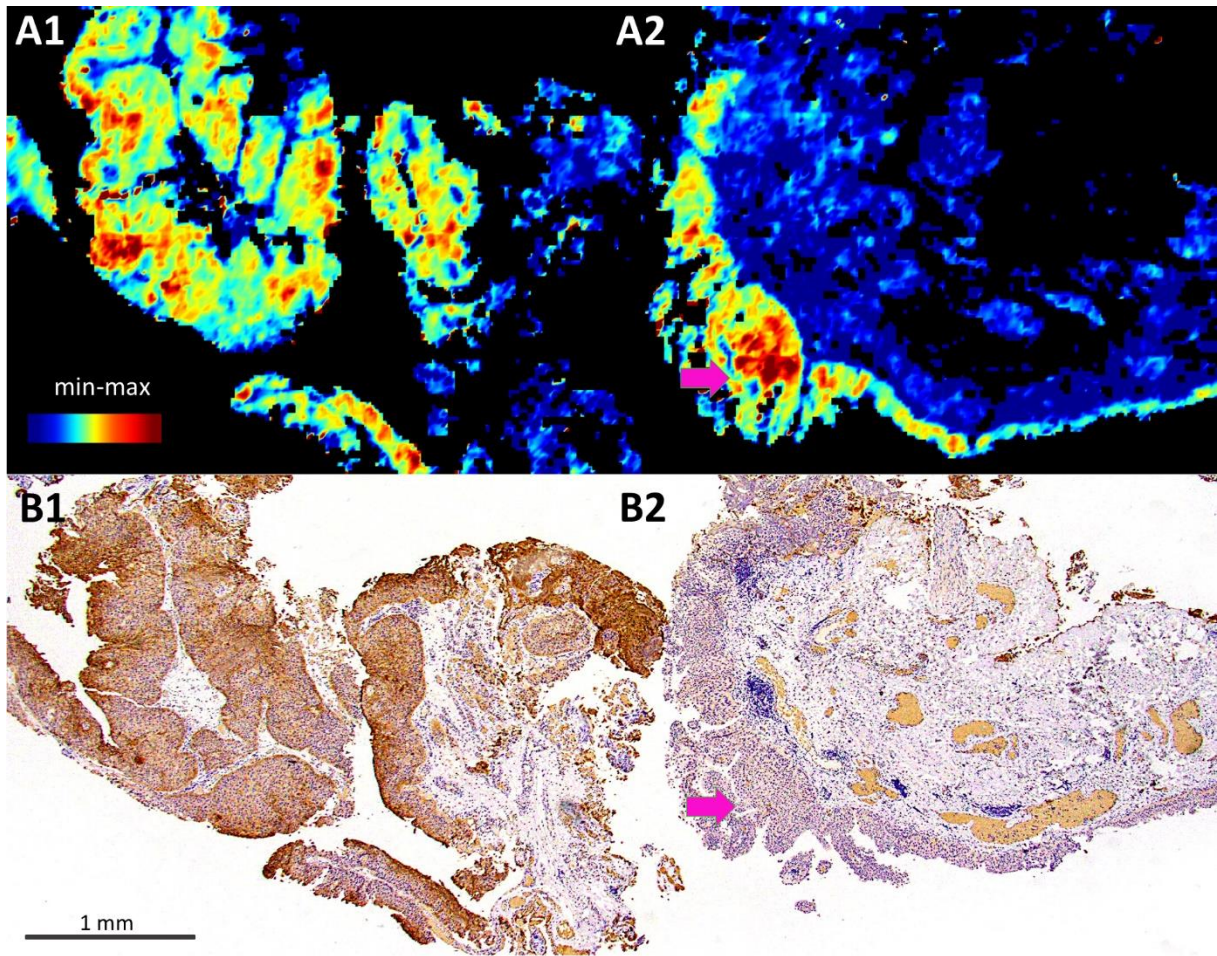

**Figure S1.** The comparison of IR distribution images for carbohydrates (**A1**, **A2**) and IHC Glut-1 expression (**B1**, **B2**, magnification 2×) for two excision samples from the T0 patient. Pink arrows in **A2** and **B2** indicate the early neoplastic changes which were not recognised in IHC.

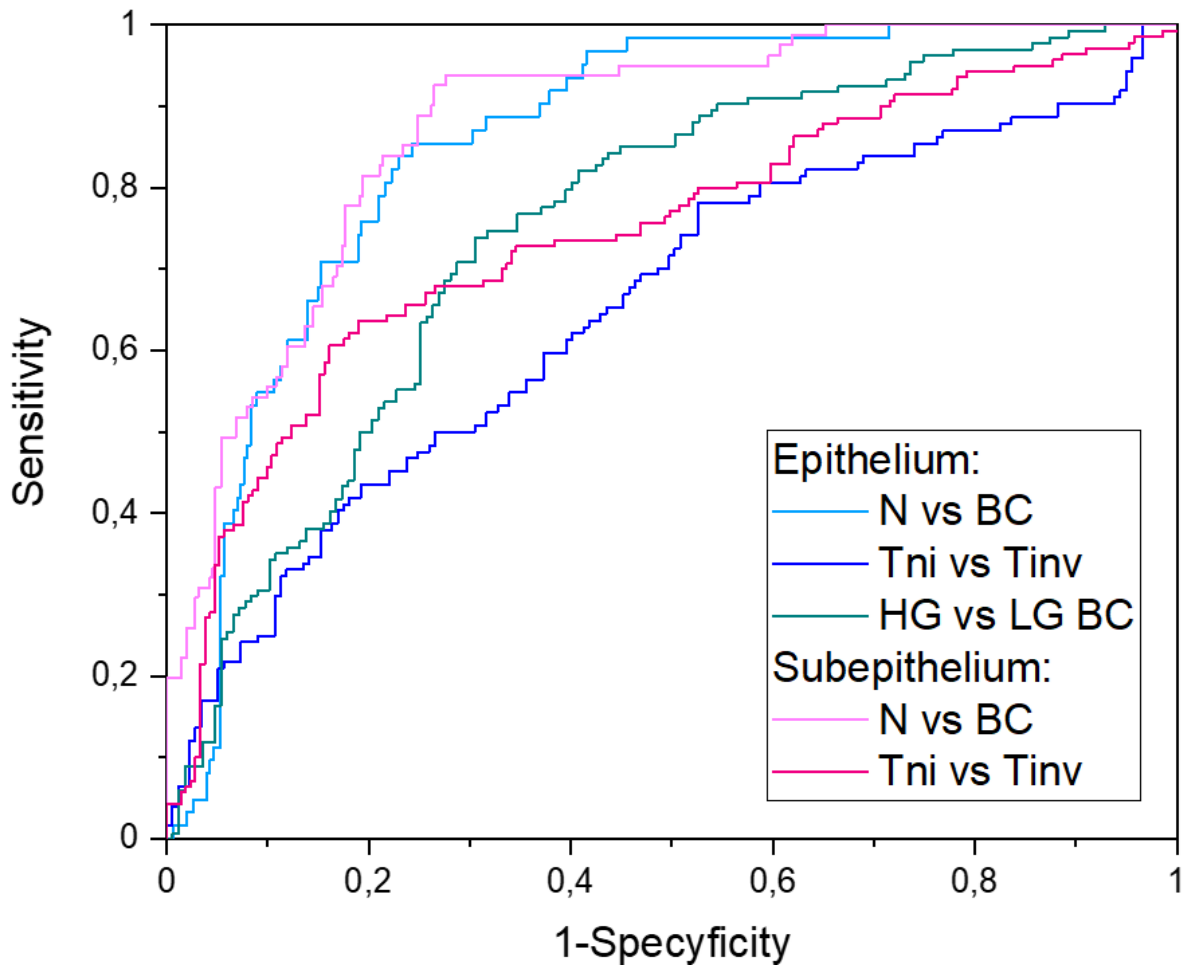

**Figure S2.** Area Under the Receiver Operation Curves for the cross validation of the patient groups.

Legend: Epithelium (n=417): n(N) = 62, n(Tni) = 124, n(Tinv) = 177, n(LG) = 167, n(HG) = 134; Subepithelium (n=494): n(N) = 81, n(Tni) = 140, n(Tinv) = 206.

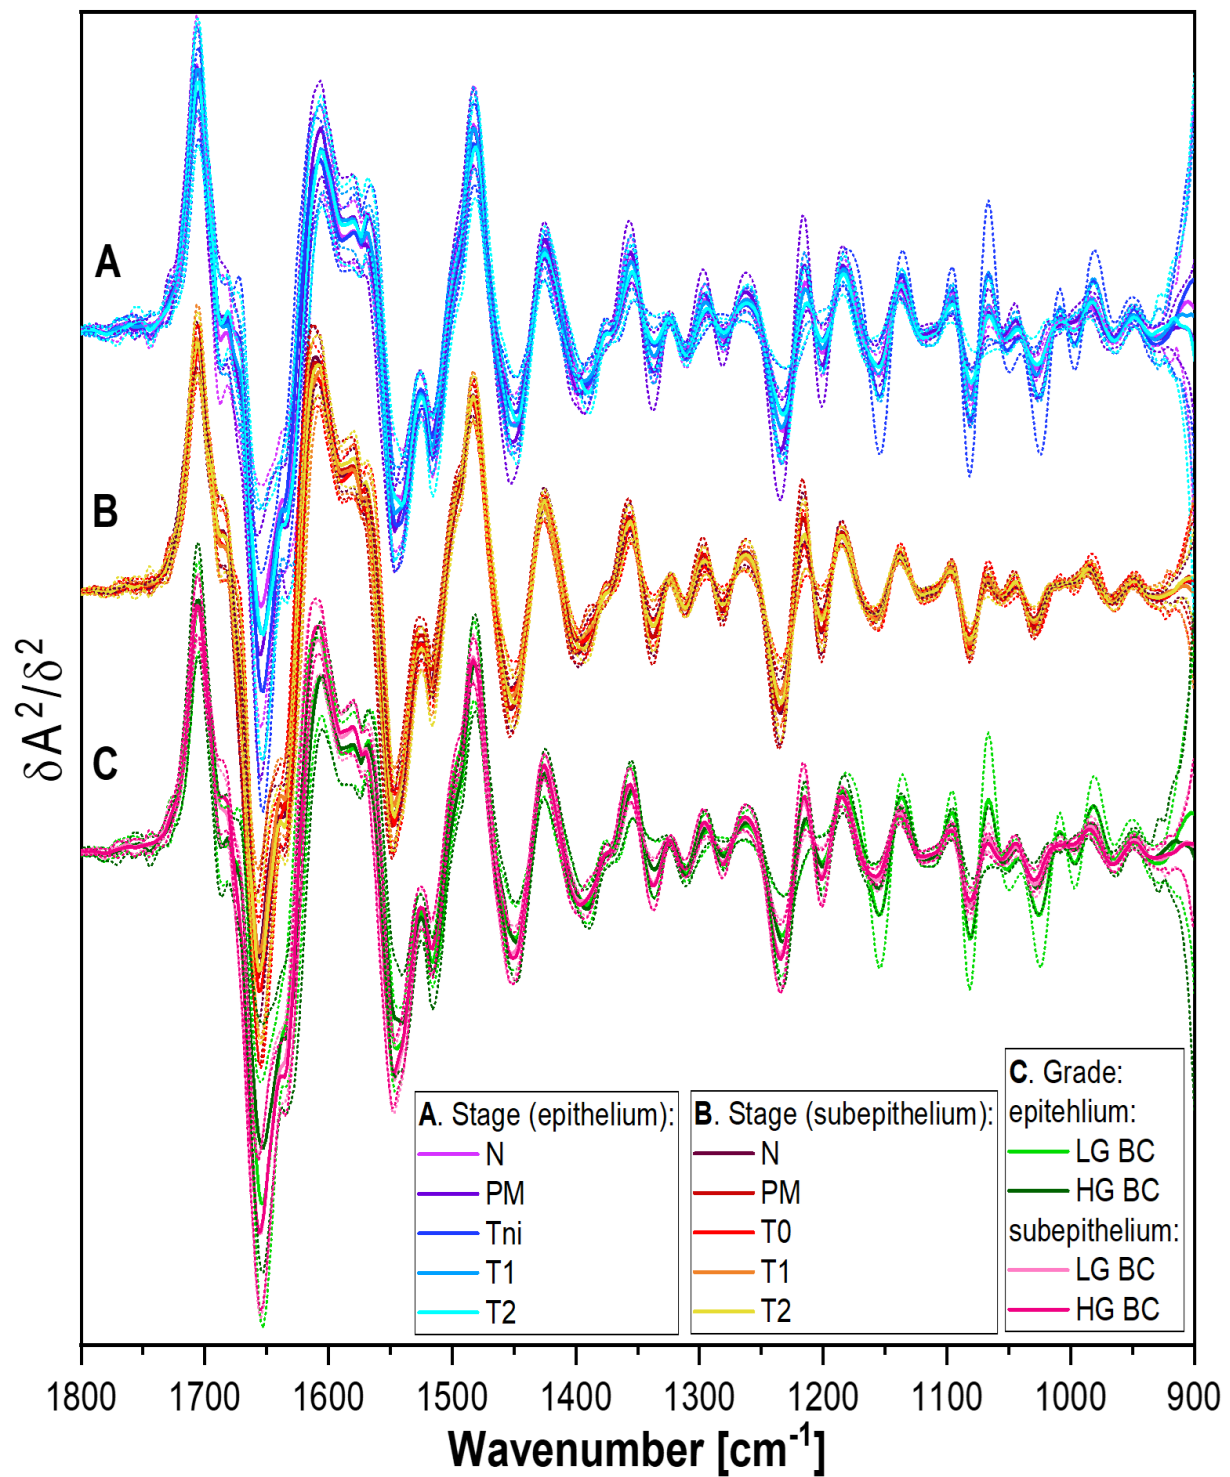

**Figure S3.** Averaged second derivatives IR spectra ( $\pm$ SD, marked with dotted lines) subjected to the epithelial and subepithelial bladder tissue (extracted from classes of UHCA).

Legend: Epithelium (n=417): n(N) = 62, n(PM) = 44, n(Tni) = 124, n(T1) = 94, n( $\geq$ T2) = 83, n(LG) = 167, n(HG) = 134; Subepithelium (n=494): n(N) = 81, n(PM) = 61, n(Tni) = 140, n(T1) = 122, n( $\geq$ T2) = 84; and Tinv is T1 +  $\geq$ T2.

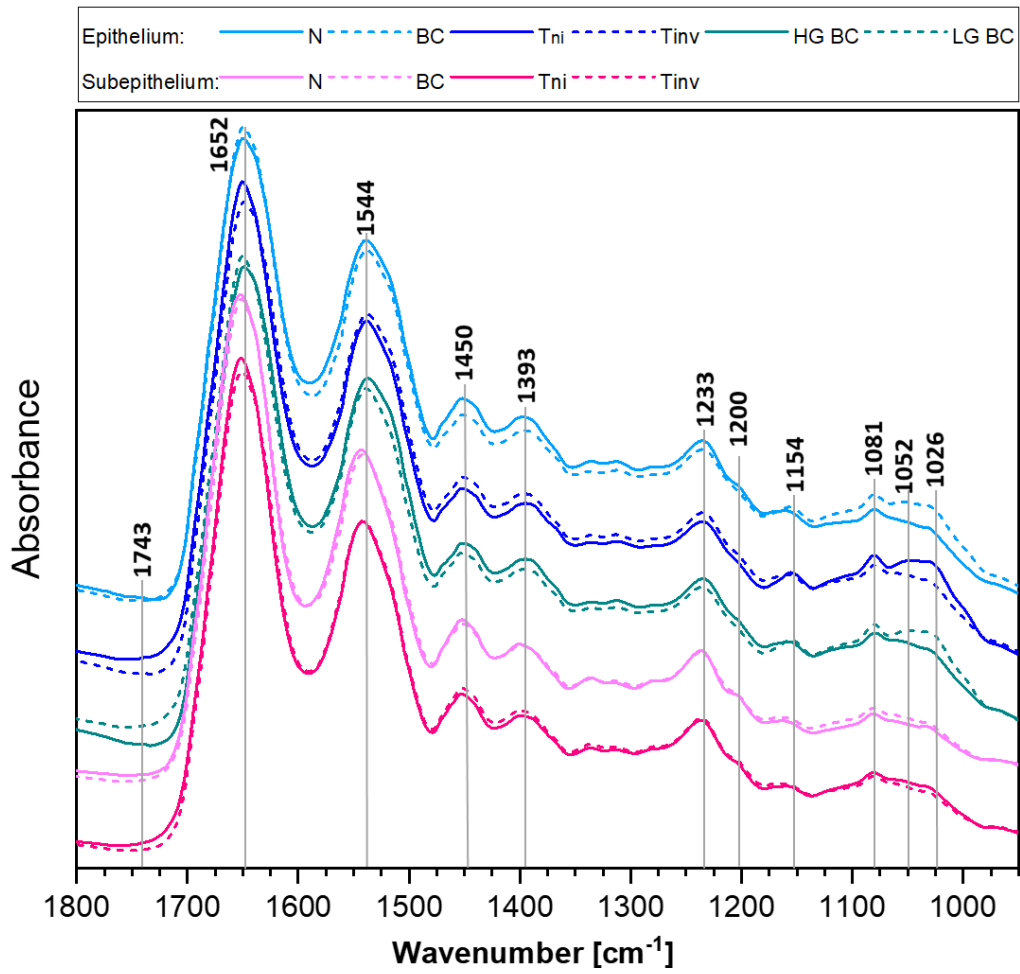

**Figure S4.** Averaged absorbance FTIR spectra of the epithelial and subepithelial tissues of the bladder (extracted from classes of UHCA).

Legend: Epithelium (n=417): n(N) = 62, n(Tni) = 124, n(Tinv) = 177, n(LG) = 167, n(HG) = 134; Subepithelium (n=494): n(N) = 81, n(Tni) = 140, n(Tinv) = 206.
